# Supplementary material
Source: Springer Nature journal article supplement (https://www.springermedizin.de/resource/supplementary/12943_2014_1402_MOESM2_ESM.pdf/9552922)

**A****Karpas 299**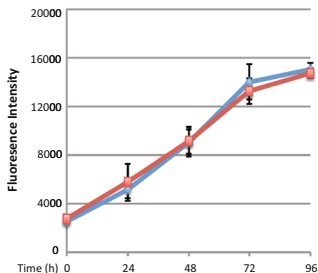**Karpas 299**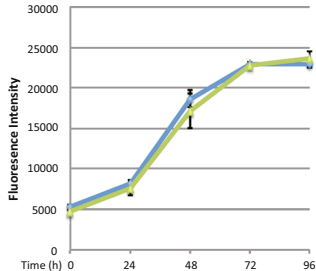**B****SUP-M2**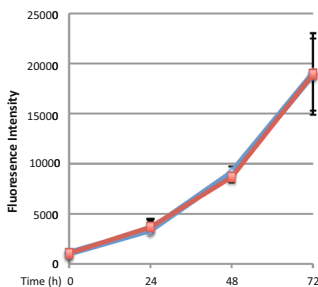**SUP-M2**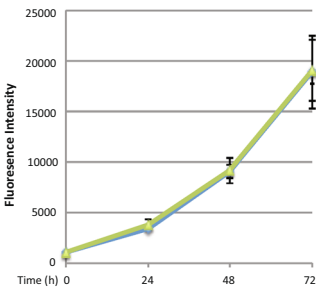**C****SR**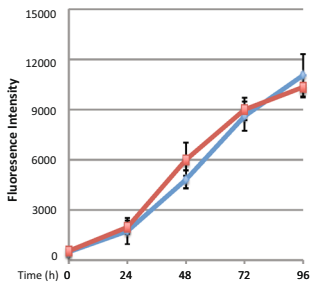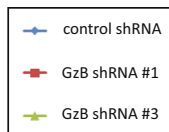

Supplement: MOESM2 [file 9552922]
